# Supplementary material
Source: PubMed Central journal article supplement (PMC3888194)
Supplement: supp_mjt035_mjt035supp.pdf [file supp_mjt035_mjt035supp.pdf]

## **Supplementary material**

### **E2F1 promotes angiogenesis through the VEGF-C/VEGFR-3 axis in a feedback loop for cooperative induction of PDGF-B**

David Engelmann<sup>1,†</sup>, Deborah Mayoli-Nüssle<sup>1,†</sup>, Christian Mayrhofer<sup>2</sup>, Katharina Fürst<sup>1</sup>, Vijay Alla<sup>1</sup>, Anja Stoll<sup>1</sup>, Alf Spitschak<sup>1</sup>, Kerstin Abshagen<sup>2</sup>, Brigitte Vollmar<sup>2</sup>, Sophia Ran<sup>3</sup> and Brigitte M. Pützer<sup>1,\*</sup>

<sup>1</sup>Institute of Experimental Gene Therapy and Cancer Research, Rostock University Medical Center, 18057 Rostock, Germany

<sup>2</sup>Institute for Experimental Surgery, Rostock University Medical Center, 18057 Rostock, Germany

<sup>3</sup>Department of Medical Microbiology, Immunology and Cell Biology, Southern Illinois University School of Medicine, Springfield, IL 62794-9626, USA

<sup>†</sup>These authors contributed equally to this work.

\*Correspondence to: Brigitte M. Pützer, Tel: +49 381 494 5066/68; Fax: +49 381 494 5062; E-mail: [brigitte.puetzer@med.uni-rostock.de](mailto:brigitte.puetzer@med.uni-rostock.de)

# S1

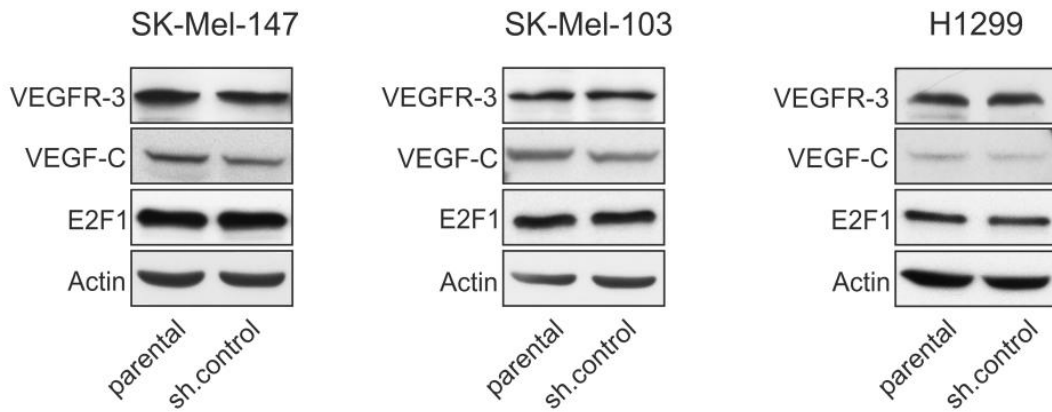

**Supplementary Figure S1** Western blot of endogenous VEGFR-3, VEGF-C, and E2F1 protein levels in parental and sh.control-expressing cells. Actin was used as loading control.

**Supplementary Table S1** Sequence of oligonucleotides used for RT-PCR, qPCR, ChIP, and generation of the VEGF-C promoter deletion mutant.

| <b>Primer</b>               | <b>Sequence</b>                     |
|-----------------------------|-------------------------------------|
| <b>E2F1 fwd</b>             | 5'-GCTGGACCACCTGATGAATATCT-3'       |
| <b>E2F1 rev</b>             | 5'-GGAGGGGCTTTGATCACCATAA-3'        |
| <b>VEGFR-3 fwd</b>          | 5'-GGCAGCTTCTCGCAGGTGT-3'           |
| <b>VEGFR-3 rev</b>          | 5'-GTTGGGGTCATGGGAATTCCT-3'         |
| <b>VEGF-C fwd</b>           | 5'-CACTTCCTGCCGATGCATGTCTAA-3'      |
| <b>VEGF-C rev</b>           | 5'-CATCTCCAGCATCCGAGGAAAACA-3'      |
| <b>PDGF-B fwd</b>           | 5'-GGCCGAGTTGGACCTGAACATGA-3'       |
| <b>PDGF-B rev</b>           | 5'-GAAGTTGGCGTTGGTGCGGTCTA-3'       |
| <b>Actin fwd</b>            | 5'-CGGGAAATCGTGCGTGACATTA-3'        |
| <b>Actin rev</b>            | 5'-ACCGCTCATTGCCAATGGTGAT-3'        |
| <b>VEGFR-3 E2F-site fwd</b> | 5'-TGCCGCATTTTGCTCCCCTTTG-3'        |
| <b>VEGFR-3 E2F-site rev</b> | 5'-TCCGGTGCACCCGAGCAGT-3'           |
| <b>VEGF-C E2F-site fwd</b>  | 5'-GGGTTTGGAGGGGCTGAACAT-3'         |
| <b>VEGF-C E2F-site rev</b>  | 5'-AGGTAAAAGCCTCACAGGAAACCG-3'      |
| <b>PDGF-B promoter fwd</b>  | 5'-TGTGCCAGGGTGAAATGTCT-3'          |
| <b>PDGF-B promoter rev</b>  | 5'-CGAGTCCGTCCGTCCGTCT-3'           |
| <b>PDGF-B E2F-site fwd</b>  | 5'-TGTGCCAGGGTGAAATGTCT-3'          |
| <b>PDGF-B E2F-site rev</b>  | 5'-AAGTTGCCACCCTTTCAGCTGT-3'        |
| <b>VEGF-D fwd</b>           | 5'-AACTCAGTGCAGCCCTAGAGAAAC-3'      |
| <b>VEGF-D rev</b>           | 5'-GGAAATGTACGAGGTGCTGGTGTT-3'      |
| <b>FST fwd</b>              | 5'-TGCTCTGCCAGTTCATGGAGG-3'         |
| <b>FST rev</b>              | 5'-TCGGTCCACGAGGTGCTCA-3'           |
| <b>VEGFC Prom del fwd</b>   | 5'-GAAAGCTTTCTCCAAAAAGCTACACCGAC-3' |
| <b>VEGFC Prom del rev</b>   | 5'-AGATCTCGAGGGATCCGAGAA-3'         |
